# Instructions for Obtaining ANESTHESIOLOGY Continuing Medical Education (CME) Credit

CME Editors: Leslie C. Jameson, M.D., and Dan J. Kopacz, M.D.

ANESTHESIOLOGY's Journal CME is open to all readers. Members of the American Society of Anesthesiologists (ASA) enjoy a preferred rate for their subscription. However, Journal CME is not limited to ASA members or Journal subscribers. To take part in Journal CME, complete the following steps:

1. For the article listed on the right, read the learning objectives and disclosure information.
2. Read the article in the print or online edition.
3. Register at <http://education.asahq.org/2013-journal-cme> and provide payment.
4. Once online, complete the questions and other required information for the CME program, including the evaluation.

The American Society of Anesthesiologists is accredited by the Accreditation Council for Continuing Medical Education to provide continuing medical education for physicians.

The American Society of Anesthesiologists designates this journal-based CME activity for a maximum of 1 *AMA PRA Category 1 Credit(s)*<sup>TM</sup>. Physicians should claim only the credit commensurate with the extent of their participation in the activity.

**Purpose:** The focus of ANESTHESIOLOGY Journal CME is to educate readers on current developments in the science and clinical practice of anesthesiology.

**Target Audience:** ANESTHESIOLOGY Journal CME is intended for anesthesiologists. Researchers and other health care professionals with an interest in anesthesiology may also participate.

## Claiming Credit

All tests and requests for credit must be submitted through the ANESTHESIOLOGY CME website at <http://education.asahq.org/2013-journal-cme>. Participants should claim credit in 15-minute increments, for a maximum of 1 *AMA PRA Category 1 Credit(s)*<sup>TM</sup> per journal article.

Two payment options are available:

|            | ASA Member | Non-member |
|------------|------------|------------|
| Annual Fee | \$60       | \$120      |
| Per Issue  | \$10       | \$20       |

Payment may be made using Visa or MasterCard.

Please direct any questions about Journal CME to:  
Heather Hodge

(847) 268-9209  
H.Hodge@asahq.org

## This Month's ANESTHESIOLOGY Journal CME

Read the article by Wu *et al.* entitled "Real-time two-dimensional ultrasound guidance for central venous cannulation (CVC), select an appropriate ultrasound guidance device for CVC placement, and recognize the relative risk for complications of CVC in adults and children when using a real-time two-dimensional ultrasound technique."

## Learning Objectives

After completing this activity, the learner will be able to identify elements of design important for interpretation of clinical study results, identify the serious risks of central venous cannulation (CVC), select an appropriate ultrasound guidance device for CVC placement, and recognize the relative risk for complications of CVC in adults and children when using a real-time two-dimensional ultrasound technique.

## Authors Disclosures

**Authors:** Long-hui Cao, M.D., Ph.D., received funding for research from the National Science Foundation for Distinguished Young Scholars (Beijing, China). Wei-an Zeng, M.D., Ph.D., received funding for research from the National Science Foundation (Beijing, China). Shao-yong Wu, M.D., Quan Ling, M.D., Jian Wang, M.D., and Mei-xi Xu, M.D., have no financial interest in or affiliation with any commercial supporter or providers of any commercial services discussed in this educational material.

## Journal CME Planning Participants Disclosures

**Editor-in-Chief:** James C. Eisenach, M.D., receives consulting fees from Adynxx, NeuroGesX, and Vertex.

**CME Editors:** Leslie C. Jameson, M.D., receives consulting fees and honoraria from Masimo and honoraria from GE Medical. Dan J. Kopacz, M.D., has no relevant financial relationships to disclose.

**ASA Staff:** Employees involved in planning have no relevant financial relationships to disclose.

## Expiration

Registration and submission of answers must be completed by February 28, 2016.
